# Supplementary material for: EQ-5D-Y-3L Population Norms for Children in Mainland China Derived from A Nationally Representative Survey 2023-2024
Source: Research Square preprint supplement (doi:10.21203/rs.3.rs-7085848/v1), 2025-07-23
Supplement: Supplementary file 5 [file e081bd8eaf5b21da027ba434.docx]

| **S2. Percentage of a general population sample reporting levels 1 to 3 by dimension, EQ-5D-Y-3L utility index by age group for urban (weighted)** | | | | | |
| --- | --- | --- | --- | --- | --- |
| **EQ-5D-Y-3L dimension** |  | 8-11 | 12-15 | 16-18 | Total |
| N=1061 | N=1018 | N=871 | N=2951 |
| **Mobility** | No problems | 97.25% | 96.53% | 96.82% | 96.87% |
|  | Some problems | 1.65% | 2.82% | 2.82% | 2.40% |
|  | Extreme problems | 1.10% | 0.65% | 0.36% | 0.73% |
|  | *P value* | ***p*<0.001** | | |  |
| **Self-care** | No problems | 94.27% | 97.37% | 98.48% | 96.58% |
|  | Some problems | 4.63% | 2.05% | 1.05% | 2.68% |
|  | Extreme problems | 1.10% | 0.58% | 0.47% | 0.74% |
|  | *P value* | ***p*<0.001** | | |  |
| **Usual activities** | No problems | 93.94% | 93.51% | 92.78% | 93.45% |
|  | Some problems | 5.40% | 5.98% | 6.62% | 5.96% |
|  | Extreme problems | 0.66% | 0.51% | 0.60% | 0.59% |
|  | *P value* | **p<0.001** | | |  |
| **Pain/discomfort** | No problems | 89.10% | 80.41% | 78.89% | 83.09% |
|  | Some problems | 10.24% | 18.37% | 20.46% | 16.06% |
|  | Extreme problems | 0.66% | 1.22% | 0.65% | 0.85% |
|  | *P value* | **p<0.001** | | |  |
| **Anxiety/depression** | No problems | 84.69% | 73.43% | 68.92% | 76.15% |
|  | Some problems | 14.76% | 22.87% | 27.84% | 21.42% |
|  | Extreme problems | 0.55% | 3.70% | 3.24% | 2.43% |
|  | *P value* | **p<0.001** | | |  |
| **Utility index** | Mean | 0.969 | 0.950 | 0.948 | 0.956 |
|  | SD | 0.077 | 0.096 | 0.090 | 0.088 |
|  | 95%CI | (0.967,0.970) | (0.949,0.952) | (0.946,0.950) | (0.955,0.957) |
|  | Median | 1.000 | 1.000 | 1.000 | 1.000 |
|  | IQR | 0.023 | 0.073 | 0.073 | 0.073 |
|  | 25th percentile | 0.977 | 0.927 | 0.927 | 0.927 |
|  | 75th percentile | 1.000 | 1.000 | 1.000 | 1.000 |
|  | *P value* | ***p*<0.001** | | |  |
